# Supplementary material
Source: MDPI journal article supplement (https://www.mdpi.com/2571-550X/1/1/2)
Supplement: s1 [file s1]

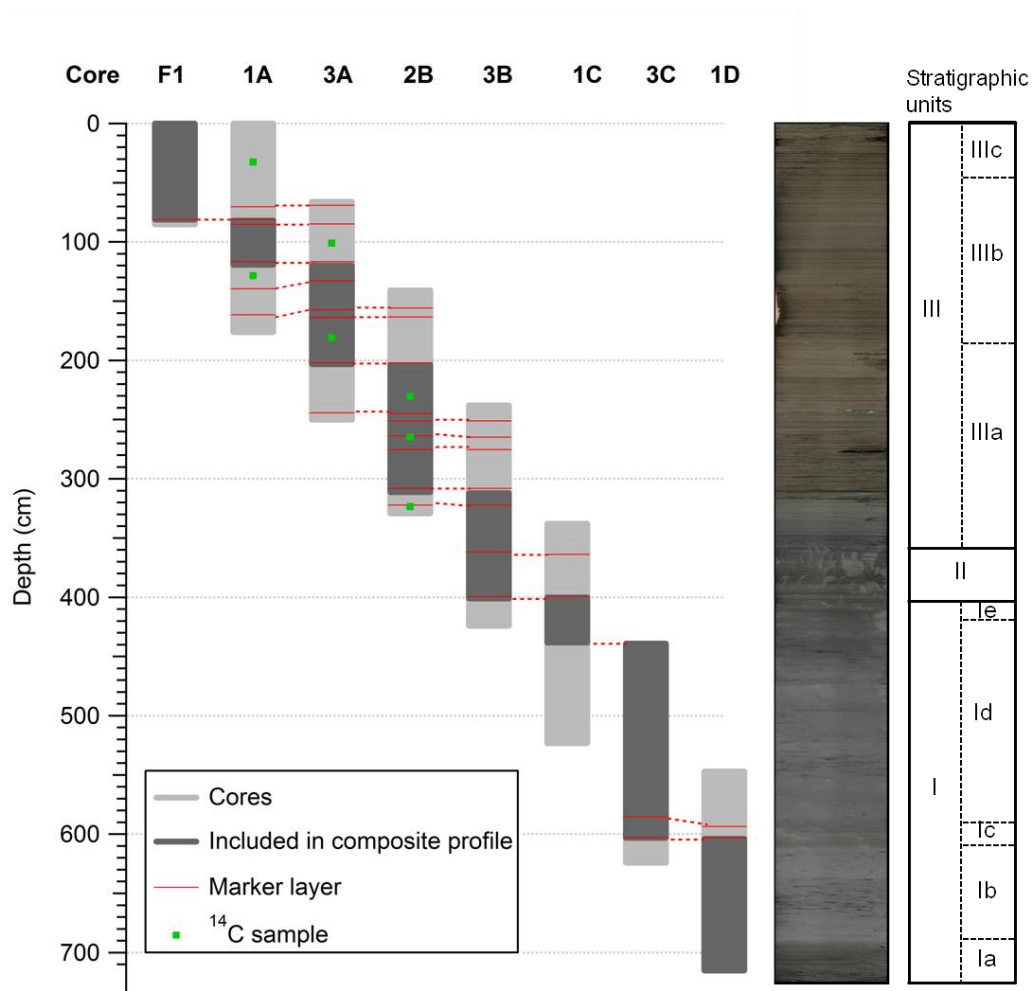

|            | Unit | Base (cm) | Top (cm) | Description                                                                                |
|------------|------|-----------|----------|--------------------------------------------------------------------------------------------|
| Main units | I    | 714.8     | 399      | brown or grayish brown clay gyttja banded with black layers                                |
|            | II   | 399       | 354      | dark gray laminated clay                                                                   |
|            | III  | 354       | 0        | dark gray diamictic sediment of varying grain size                                         |
| Subunits   | Ia   | 714.8     | 681.8    | very dark gray diamicton; harder substrate during coring                                   |
|            | Ib   | 681.8     | 602.8    | dark gray diamicton, slightly lighter than Ia                                              |
|            | Ic   | 602.8     | 583.3    | more fine-grained sediment with some laminations                                           |
|            | Id   | 583.3     | 415.6    | dark gray diamicton                                                                        |
|            | Ie   | 415.6     | 399      | more fine-grained sediment with some ca. 5 mm thick laminae                                |
|            | II   | 399       | 354      | dark gray laminated clay (laminae of ca. 1 mm)                                             |
|            | IIIa | 354       | 190      | grayish brown clay gyttja banded with black layers; the transition to unit IIIb is gradual |
|            | IIIb | 190       | 43       | brown clay gyttja banded with black layers                                                 |
|            | IIIc | 43        | 0        | dark brown clay gyttja banded with black layers                                            |

**Figure S1.** Schematic overview of the sediment cores from Lake Storsjön. The dark grey areas mark the parts of the cores included in the composite sediment profile (STO14) as shown on the photograph. Solid red lines represent the marker layers that were identified to align overlapping cores, dashed red lines link the corresponding markers. Green squares indicate the depths where radiocarbon samples were taken. The table gives a short description of the defined lithological units.
